# Supplementary material for: Insight into the significant roles of microstructures and functional groups on carbonaceous surfaces for acetone adsorption
Source: Royal Society of Chemistry journal article supplement (doi:10.1039/c8ra03099e), 2018-01-01
Supplement: c8ra03099e1.pdf [file c8ra03099e1.pdf]

## **Supplementary Information**

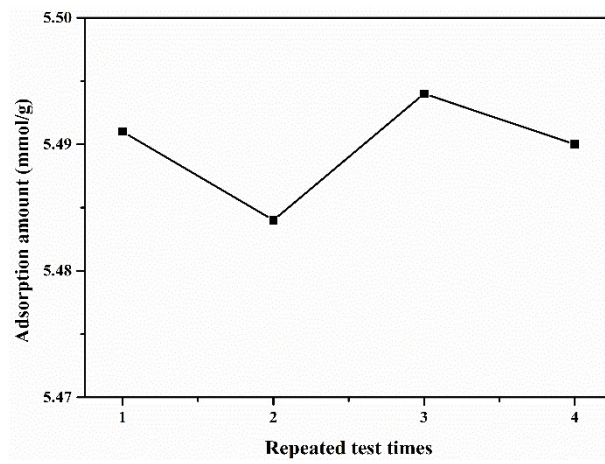

**Fig. S1.** Variation of acetone adsorption amounts on AC-N at different repeated times.

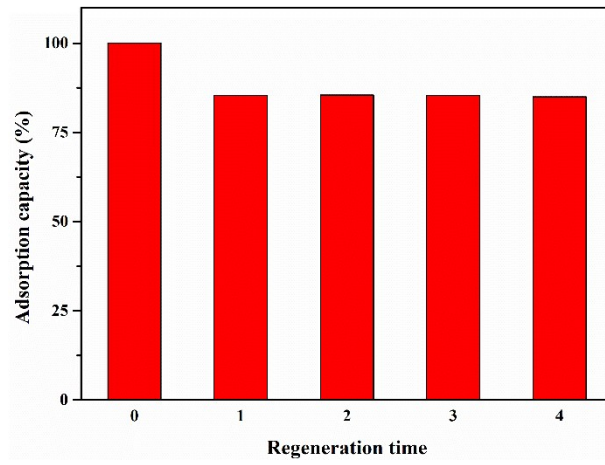

**Fig. S2.** Influence of regeneration times on the adsorption capacity of AC-N.

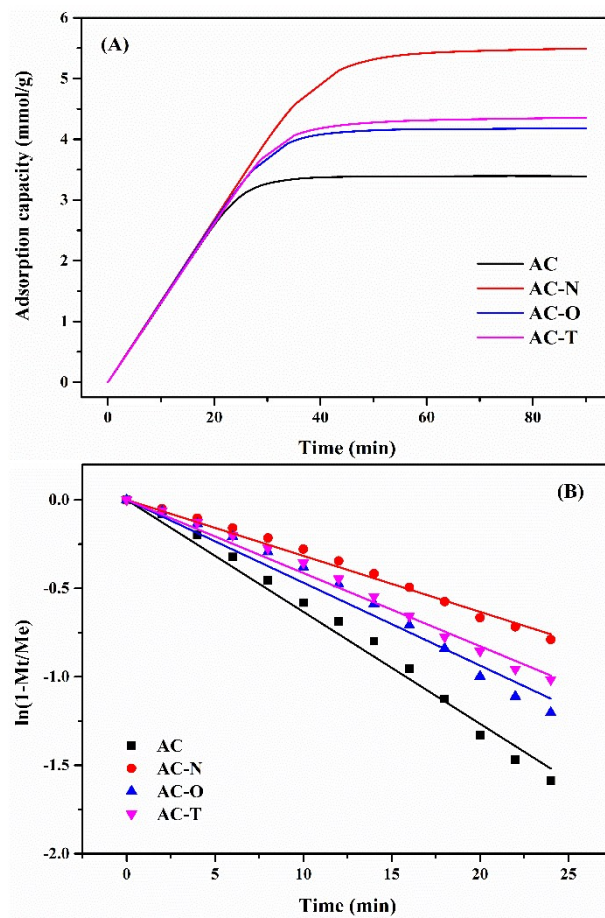

**Fig. S3.** Acetone adsorption kinetics studies on ACs with various treatments: (A) adsorption kinetics curves, and (B) linear fit of LDF model.

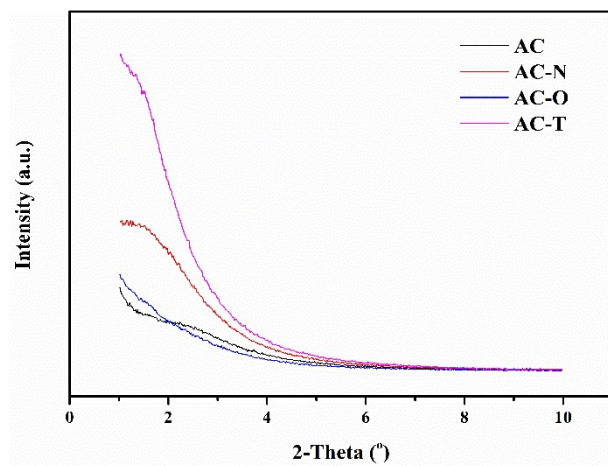

**Fig. S4.** Small-angle XRD patterns of ACs with various treatments.

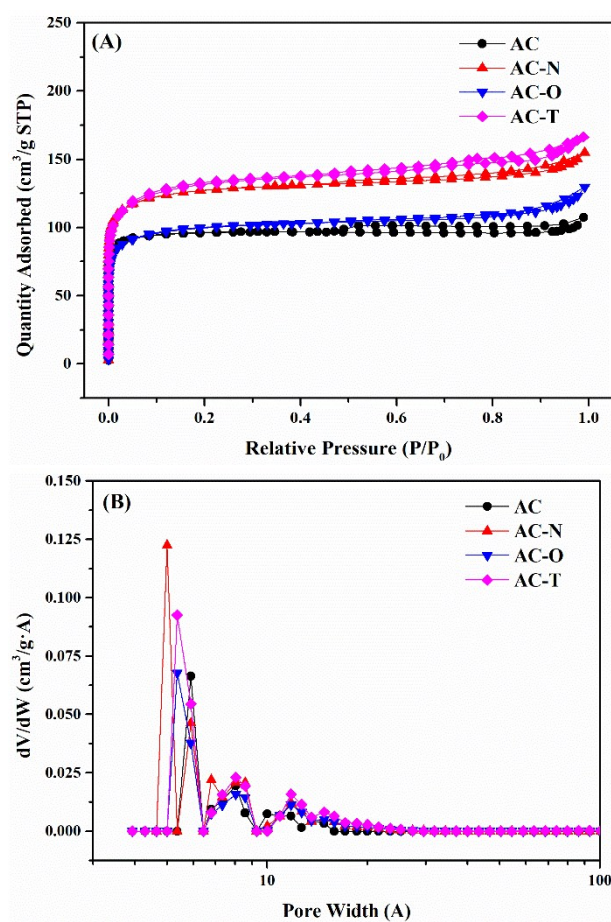

**Fig. S5.**  $\text{N}_2$  adsorption-desorption isotherms at 77 K (A) and pore size distribution calculated by DFT (B).

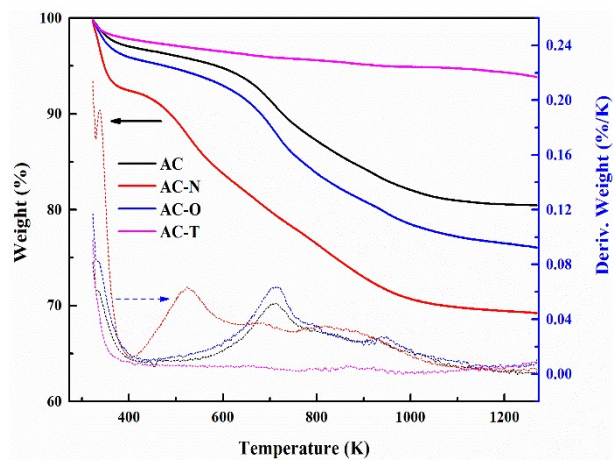

**Fig. S6.** TG-DTA curves of ACs with different treatments.

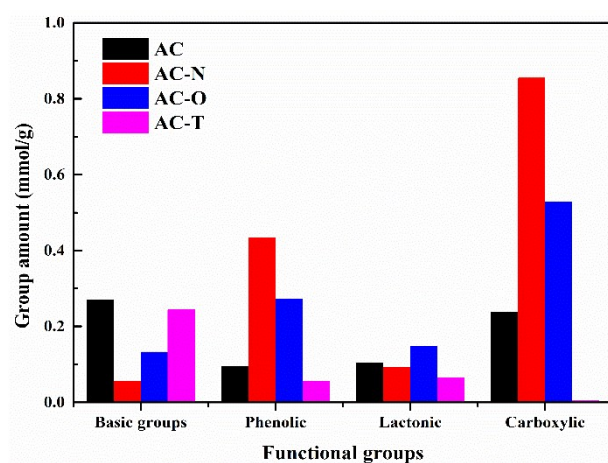

Fig. S7. Surface functional groups of ACs with different treatments.



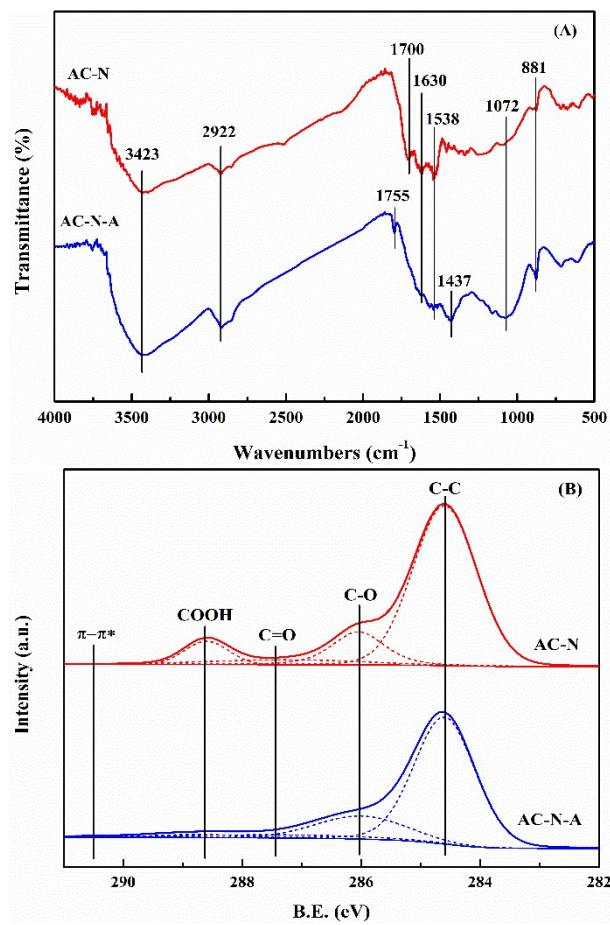

**Fig. S8.** (A) FTIR spectra and (B) C1s XPS spectra of AC-N before and after acetone adsorption.
